# Supplementary material for: A triple modality BSA-coated dendritic nanoplatform for NIR imaging, enhanced tumor penetration and anticancer therapy
Source: Royal Society of Chemistry journal article supplement (doi:10.1039/c7nr09552j), 2018-01-01
Supplement: c7nr09552j1.pdf [file c7nr09552j1.pdf]

## A Triple Modality BSA-Coated Dendritic Nanoplatfor for Simultaneous NIR Imaging, Enhanced Tumor Penetration and Anticancer Therapy

Jie Cao <sup>a, \*</sup>, Ruifen Ge <sup>a</sup>, Min Zhang <sup>b</sup>, Junfei Xia <sup>c</sup>, Shangcong Han <sup>a</sup>, Wei Lu <sup>a</sup>, Yan

Liang <sup>a</sup>, Tingting Zhang <sup>a</sup>, Yong Sun <sup>a, \*</sup>

<sup>a</sup> School of Pharmacy, Qingdao University, Qingdao, China, 266021

<sup>b</sup> Institute of Biomedical Materials and Engineering, College of Materials Sciences  
and Engineering, Qingdao University, Qingdao, China, 266071

<sup>c</sup> Department of Bioengineering, Northeastern University, Boston, Massachusetts,  
USA, 02115

\*Corresponding Author: Dr. Jie Cao ([caojie0829@hotmail.com](mailto:caojie0829@hotmail.com)) and Dr. Yong Sun  
([sunyongqdu@163.com](mailto:sunyongqdu@163.com)).

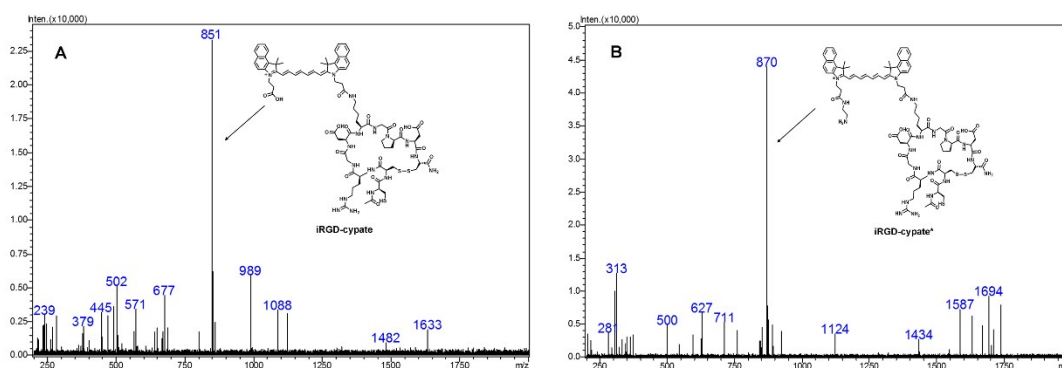

Figure S1 Q-TOF Micro MS profile of (A) iRGD-Cyp ( $[M+2H]^{2+}$ : 851) and (B) iRGD-Cyp\* ( $[M+2H]^{2+}$ : 870)

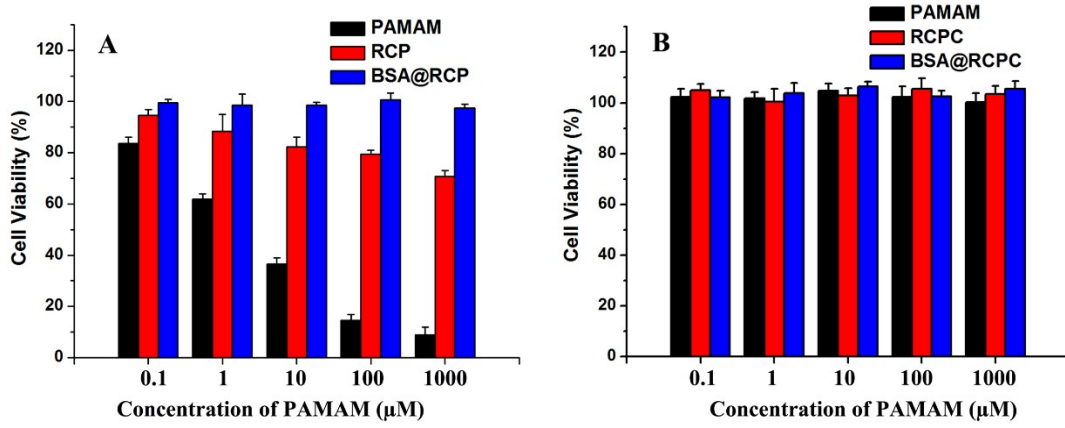

Figure S2 Cell viability of functionalized PAMAM (A) and PAMAM-COOH dendrimers (B) in embryo osteoblast precursor MC3T3-E1 cell lines with different concentration of PAMAM or PAMAM-COOH (0.1, 1,10, 100 and 1000 μM) after incubated for 72 h.
